# Supplementary material
Source: Springer Nature journal article supplement (https://www.springermedizin.de/resource/supplementary/12888_2011_937_MOESM2_ESM.pdf/9479286)

BDI-scores in 2005

40  
30  
20  
10  
0

IL-13 (pg/ml)

0.00 1.00 2.00 3.00 4.00 5.00 6.00 7.00 8.00 9.00 10.00 11.00 12.00 13.00 14.00 15.00

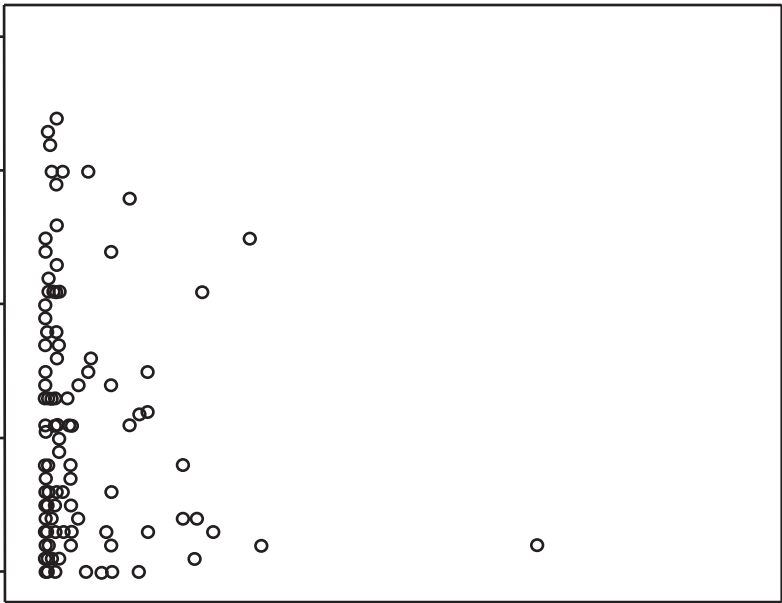

Supplement: MOESM2 [file 9479286]
